# Supplementary material
Source: MDPI journal article supplement (https://www.mdpi.com/2308-3417/3/2/17)
Supplement: s1 [file s1]

Pre-diabetes and Supplement Study (PASS)

**Instructions:** The following questions ask you about your feelings and thoughts during the last month. In each case, please indicate with a check how often you felt or thought a certain way.

1. In the last month, how often have you been upset because of something that happened unexpectedly?

\_\_\_0=never      \_\_\_1=almost never      \_\_\_2=sometimes      \_\_\_3=fairly often      \_\_\_4=very often

2. In the last month, how often have you felt that you were unable to control the important things in your life?

\_\_\_0=never      \_\_\_1=almost never      \_\_\_2=sometimes      \_\_\_3=fairly often      \_\_\_4=very often

3. In the last month, how often have you felt nervous or "stressed"?

\_\_\_0=never      \_\_\_1=almost never      \_\_\_2=sometimes      \_\_\_3=fairly often      \_\_\_4=very often

4. In the last month, how often have you felt confident about your ability to handle your personal problems?

\_\_\_0=never      \_\_\_1=almost never      \_\_\_2=sometimes      \_\_\_3=fairly often      \_\_\_4=very often

5. In the last month, how often have you felt that things were going your way?

\_\_\_0=never      \_\_\_1=almost never      \_\_\_2=sometimes      \_\_\_3=fairly often      \_\_\_4=very often

6. In the last month, how often have you found that you could not cope with all the things that you had to do?

\_\_\_0=never      \_\_\_1=almost never      \_\_\_2=sometimes      \_\_\_3=fairly often      \_\_\_4=very often

7. In the last month, how often have you been able to control irritations in your life?

\_\_\_0=never      \_\_\_1=almost never      \_\_\_2=sometimes      \_\_\_3=fairly often      \_\_\_4=very often

8. In the last month, how often have you felt that you were on top of things?

\_\_\_0=never      \_\_\_1=almost never      \_\_\_2=sometimes      \_\_\_3=fairly often      \_\_\_4=very often

9. In the last month, how often have you been angered because of things that were outside of your control?

\_\_\_0=never      \_\_\_1=almost never      \_\_\_2=sometimes      \_\_\_3=fairly often      \_\_\_4=very often

10. In the last month, how often have you felt difficulties were piling up so high that you could not overcome them?

\_\_\_0=never      \_\_\_1=almost never      \_\_\_2=sometimes      \_\_\_3=fairly often      \_\_\_4=very often
