# Supplementary material
Source: MDPI journal article supplement (https://www.mdpi.com/2308-3417/3/2/17)
Supplement: s1 [file s1]

**PSYCHOSOCIAL - DEPRESSIVE SYMPTOMS**

Participant is unable or unwilling to complete this section.

No

Yes

0

1

*If "Yes", specify reasons and skip this page.**Below is a list of the ways you might have felt or behaved.**Please indicate how often you have felt this way during the past week.*

| <i>Would you say in the last week</i>                     | Rarely or none<br>of time (less<br>than 1 day) | Some or little<br>of the time (1<br>- 2 days) | Occasionally or a<br>moderate amount<br>of the time (3 - 4<br>days) | Most of the<br>time | Don't know or<br>refused |
|-----------------------------------------------------------|------------------------------------------------|-----------------------------------------------|---------------------------------------------------------------------|---------------------|--------------------------|
| 1. I was bothered by things that usually don't bother me. | 0                                              | 1                                             | 2                                                                   | 3                   | 9                        |
| 2. I did not feel like eating, my appetite was poor.      | 0                                              | 1                                             | 2                                                                   | 3                   | 9                        |
| 3. I had trouble keeping my mind on what I was doing.     | 0                                              | 1                                             | 2                                                                   | 3                   | 9                        |
| 4. I felt that everything I did was an effort.            | 0                                              | 1                                             | 2                                                                   | 3                   | 9                        |
| 5. I felt depressed                                       | 0                                              | 1                                             | 2                                                                   | 3                   | 9                        |
| 6. I felt hopeful about the future.                       | 0                                              | 1                                             | 2                                                                   | 3                   | 9                        |
| 7. I felt fearful.                                        | 0                                              | 1                                             | 2                                                                   | 3                   | 9                        |
| 8. My sleep was restless.                                 | 0                                              | 1                                             | 2                                                                   | 3                   | 9                        |
| 9. I was happy.                                           | 0                                              | 1                                             | 2                                                                   | 3                   | 9                        |
| 10. I felt lonely.                                        | 0                                              | 1                                             | 2                                                                   | 3                   | 9                        |
| 11. I could not get going.                                | 0                                              | 1                                             | 2                                                                   | 3                   | 9                        |
